# Supplementary material
Source: PubMed Central journal article supplement (PMC7612798)

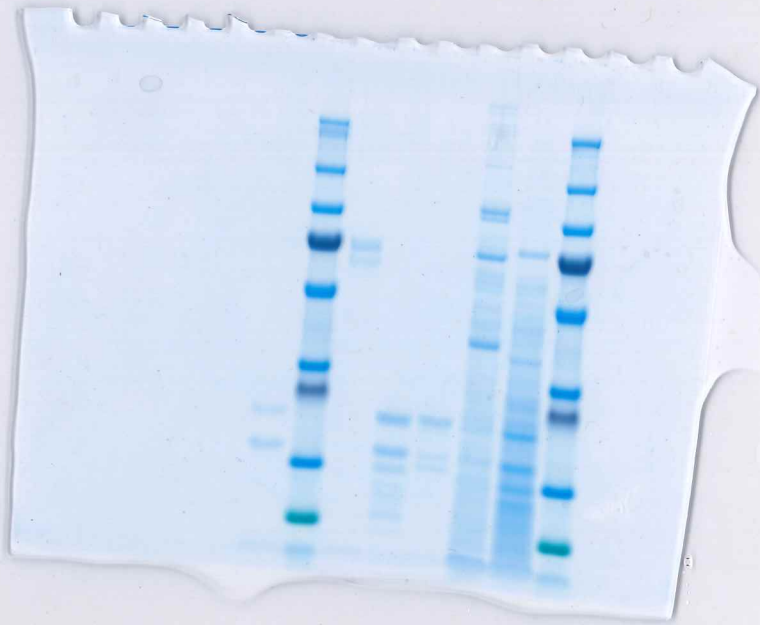

Supplement: EMS144532-supplement-Source_Data_Figure_3d.pdf [file EMS144532-supplement-Source_Data_Figure_3d.pdf]

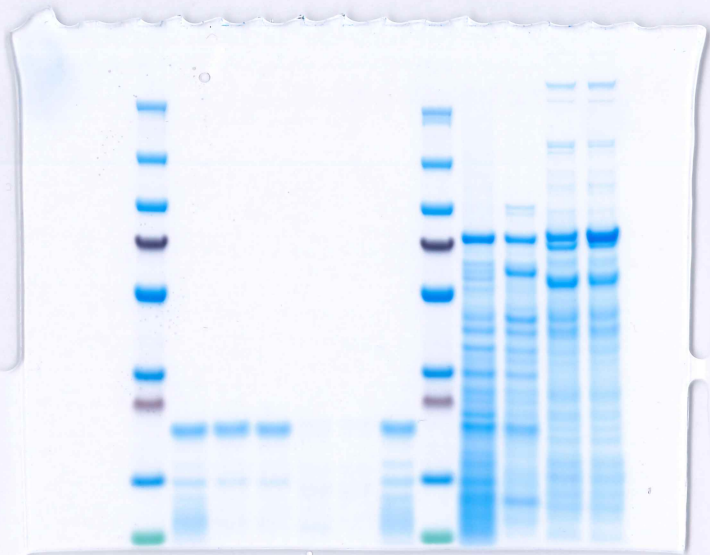

Supplement: EMS144532-supplement-Source_Data_Figure_4c.pdf [file EMS144532-supplement-Source_Data_Figure_4c.pdf]
